# Supplementary material for: Glucocorticoids rapidly activate cAMP production via Gαs to initiate non‐genomic signaling that contributes to one‐third of their canonical genomic effects
Source: PubMed Central journal article supplement — FASEB J. 2019 Dec 27;34(2):2882–95. doi: 10.1096/fj.201902521R (PMC7027561; doi:10.1096/fj.201902521r), 2019-12-27
Supplement: FSB2-34-2882-s001.pdf [file FSB2-34-2882-s001.pdf]

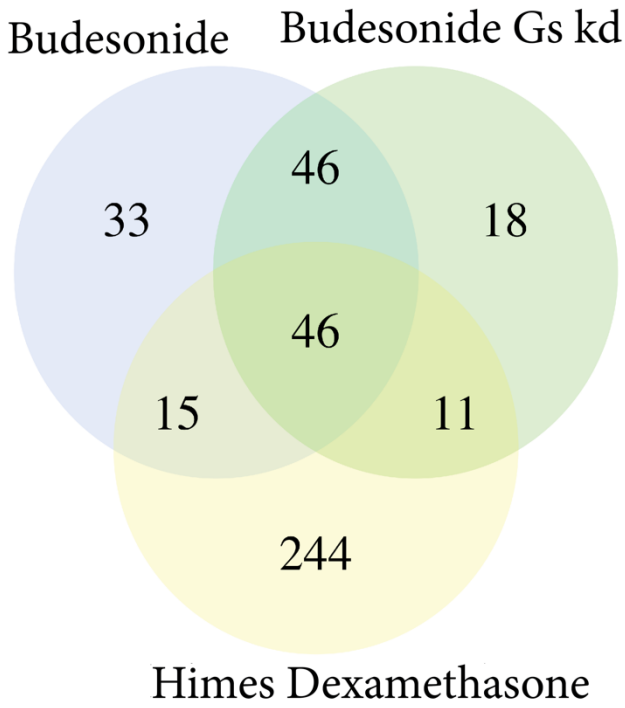

**Supplemental Figure 1:** Venn diagram showing the overlap of differentially expressed genes due to budesonide 24-hour treatment in (1) control, (2)  $G_{\alpha s}$  knockdown (kd) HASM, and (3) dexamethasone 18-hour treatment in control HASM published by Himes et al. 2014.

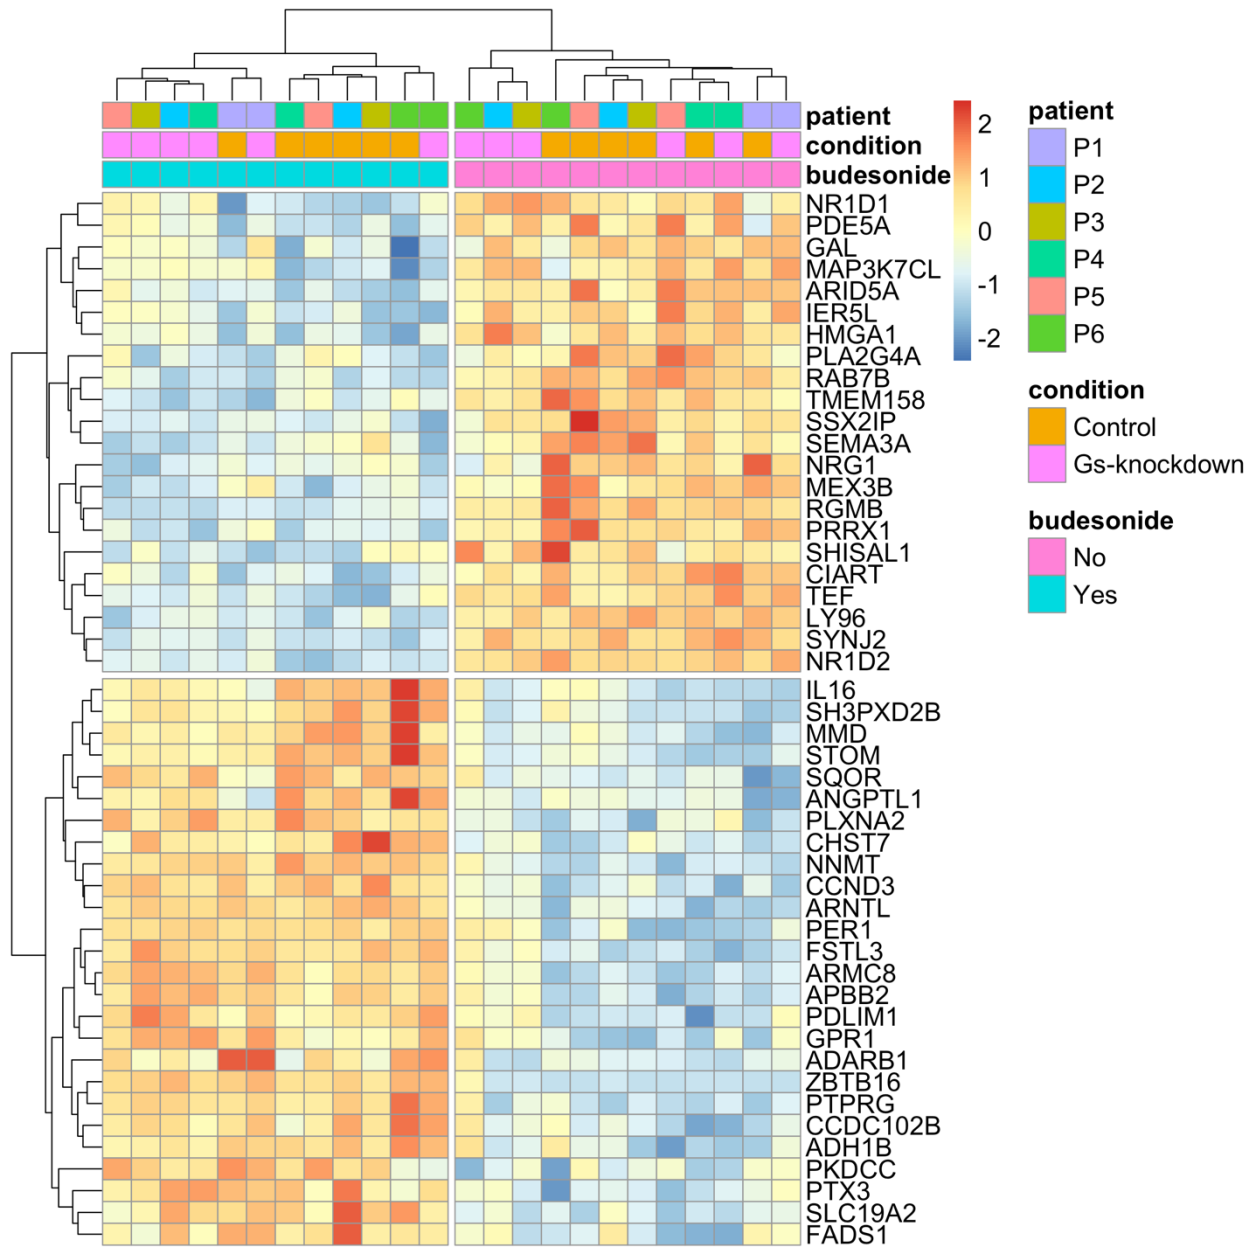

**Supplemental Figure 2:** Unsupervised Hierarchical clustering of  $\log_2(\text{TPM})$  gene expression of 48 genes unique in budesonide signature compared to  $G_{\alpha_s}$ -knockdown budesonide signature captures budesonide-specific transcriptional activity in HASM. Dendrograms represent the hierarchical clustering based on the Euclidean distance between two gene expression values or two samples. 26 of the 48 genes are overexpressed with budesonide treatment. Darker red indicates higher expression, and darker blue indicates lower expression.

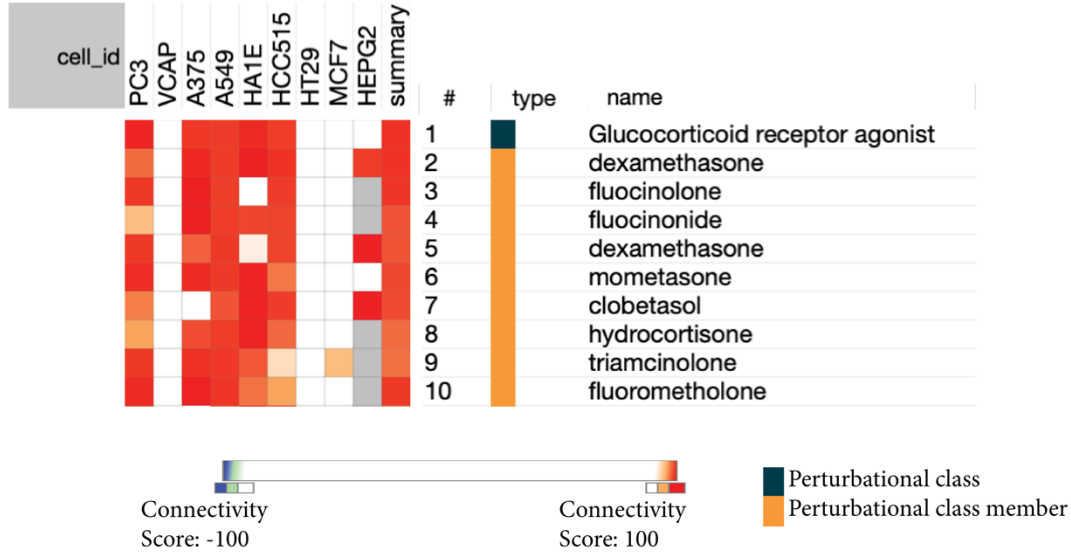

**Supplemental Figure 3:** Top 10 ranked connectivity scores, quantitative scores between a query gene-list and a perturbagen in nine cell lines. Members of glucocorticoid agonists had high connectivity score when 48 genes unique to budesonide’s  $G_{\alpha S}$ -dependent gene expression were queried for similarities and dissimilarities against more than a million gene expression signatures in ConnectivityMap (CMap), a publicly available database.

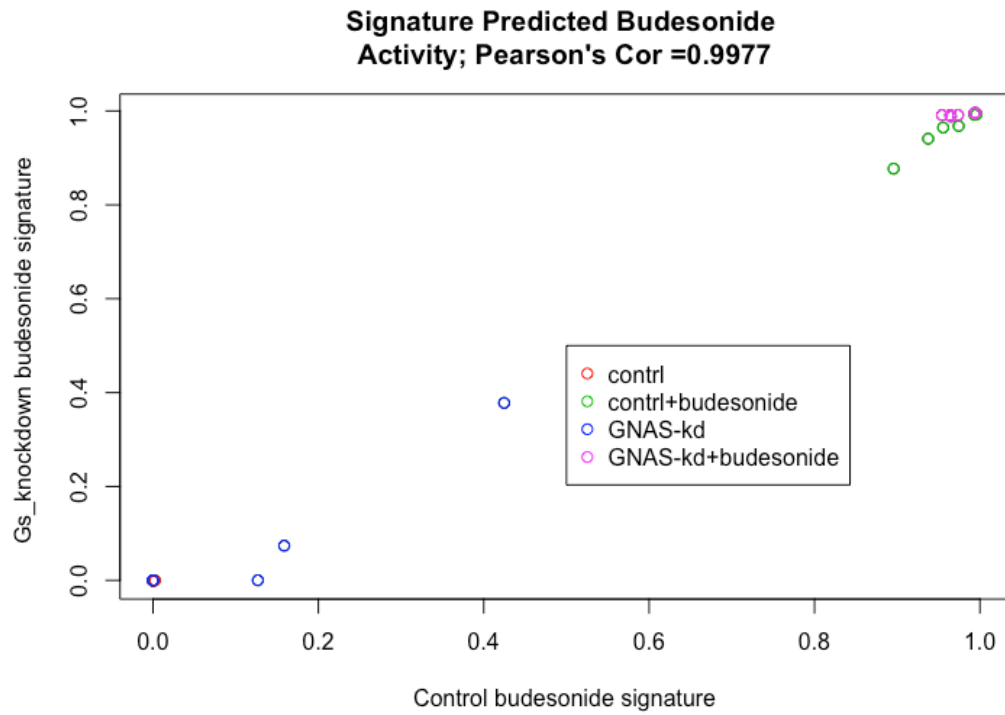

**Supplemental Figure 4:** Predicted budesonide activities using both budesonide (genomic + non-genomic) and budesonide  $G_{\alpha s}$  knockdown (genomic only) signatures were significantly correlated ( $r=0.9977$ ,  $p$ -value  $< 0.0001$ ).

**Supplemental Table 1:** Predicted budesonide activity using budesonide (genomic + non-genomic) and budesonide G<sub>αs</sub> knockdown (genomic only) signatures in 34 Human Airway Smooth Muscle samples from Kan et al.<sup>40</sup>

| <b>ID_REF</b>     | <b>Sample characteristics disease</b> | <b>Sample characteristics treatment</b> | <b>Budesonide activity signature (genomic + non-genomic)</b> | <b>Budesonide activity signature (genomic only)</b> |
|-------------------|---------------------------------------|-----------------------------------------|--------------------------------------------------------------|-----------------------------------------------------|
| <b>GSM2473333</b> | asthma                                | budesonide                              | 0.98                                                         | 0.96                                                |
| <b>GSM2473339</b> | asthma                                | budesonide                              | 0.86                                                         | 0.94                                                |
| <b>GSM2473344</b> | asthma                                | budesonide                              | 0.97                                                         | 0.98                                                |
| <b>GSM2473345</b> | asthma                                | budesonide                              | 0.97                                                         | 0.99                                                |
| <b>GSM2473350</b> | asthma                                | budesonide                              | 0.96                                                         | 0.96                                                |
| <b>GSM2473354</b> | asthma                                | budesonide                              | 0.98                                                         | 0.99                                                |
| <b>GSM2473355</b> | asthma                                | budesonide                              | 0.97                                                         | 0.94                                                |
| <b>GSM2473361</b> | asthma                                | budesonide                              | 0.98                                                         | 0.99                                                |
| <b>GSM2473366</b> | asthma                                | budesonide                              | 0.98                                                         | 0.98                                                |
| <b>GSM2473337</b> | non_asthma                            | budesonide                              | 0.97                                                         | 0.96                                                |
| <b>GSM2473340</b> | non_asthma                            | budesonide                              | 0.98                                                         | 0.98                                                |
| <b>GSM2473341</b> | non_asthma                            | budesonide                              | 0.98                                                         | 0.98                                                |
| <b>GSM2473349</b> | non_asthma                            | budesonide                              | 0.98                                                         | 0.98                                                |
| <b>GSM2473351</b> | non_asthma                            | budesonide                              | 0.98                                                         | 0.99                                                |
| <b>GSM2473359</b> | non_asthma                            | budesonide                              | 0.94                                                         | 0.97                                                |
| <b>GSM2473362</b> | non_asthma                            | budesonide                              | 0.99                                                         | 0.99                                                |
| <b>GSM2473363</b> | non_asthma                            | budesonide                              | 0.98                                                         | 0.98                                                |
| <b>GSM2473334</b> | asthma                                | vehicle                                 | 0                                                            | 0                                                   |
| <b>GSM2473335</b> | asthma                                | vehicle                                 | 0                                                            | 0                                                   |
| <b>GSM2473336</b> | asthma                                | vehicle                                 | 0                                                            | 0                                                   |
| <b>GSM2473346</b> | asthma                                | vehicle                                 | 0                                                            | 0                                                   |
| <b>GSM2473347</b> | asthma                                | vehicle                                 | 0                                                            | 0                                                   |
| <b>GSM2473348</b> | asthma                                | vehicle                                 | 0                                                            | 0                                                   |
| <b>GSM2473356</b> | asthma                                | vehicle                                 | 0                                                            | 0                                                   |
| <b>GSM2473357</b> | asthma                                | vehicle                                 | 0                                                            | 0                                                   |
| <b>GSM2473358</b> | asthma                                | vehicle                                 | 0                                                            | 0                                                   |
| <b>GSM2473338</b> | non_asthma                            | vehicle                                 | 0                                                            | 0                                                   |
| <b>GSM2473342</b> | non_asthma                            | vehicle                                 | 0                                                            | 0                                                   |
| <b>GSM2473343</b> | non_asthma                            | vehicle                                 | 0                                                            | 0                                                   |
| <b>GSM2473352</b> | non_asthma                            | vehicle                                 | 0                                                            | 0                                                   |
| <b>GSM2473353</b> | non_asthma                            | vehicle                                 | 0                                                            | 0                                                   |
| <b>GSM2473360</b> | non_asthma                            | vehicle                                 | 0                                                            | 0                                                   |
| <b>GSM2473364</b> | non_asthma                            | vehicle                                 | 0                                                            | 0                                                   |
| <b>GSM2473365</b> | non_asthma                            | vehicle                                 | 0                                                            | 0                                                   |

**Supplemental Table 2:** Ranked connectivity scores (CS) for highly similar (>95) and dissimilar (<-95) gene expression against more than 1.7 million perturbation samples in CMAP database filtered for perturbation class and perturbation class members.

| <b>Connectivity Score (CS)</b> | <b>Name</b>                       | <b>Description</b>                 |
|--------------------------------|-----------------------------------|------------------------------------|
| 98.97                          | Glucocorticoid receptor agonist   | -                                  |
| 98.84                          | dexamethasone                     | Glucocorticoid receptor agonist    |
| 98.77                          | fluocinolone                      | Glucocorticoid receptor agonist    |
| 98.59                          | fluorometholone                   | Glucocorticoid receptor agonist    |
| 98.56                          | tacrolimus                        | Calcineurin inhibitor              |
| 98.13                          | halometasone                      | Glucocorticoid receptor agonist    |
| 98.06                          | mometasone                        | Glucocorticoid receptor agonist    |
| 97.96                          | clobetasol                        | Glucocorticoid receptor agonist    |
| 97.65                          | fluocinonide                      | Glucocorticoid receptor agonist    |
| 97.59                          | betamethasone                     | Glucocorticoid receptor agonist    |
| 97.57                          | methylprednisolone                | Glucocorticoid receptor agonist    |
| 97.42                          | fludroxycortide                   | Glucocorticoid receptor agonist    |
| 97.32                          | alclometasone                     | Glucocorticoid receptor agonist    |
| 97.29                          | megestrol                         | progesterone receptor agonist      |
| 97.24                          | beclometasone                     | Glucocorticoid receptor agonist    |
| 97.08                          | fluticasone                       | Glucocorticoid receptor agonist    |
| 97.08                          | L-690330                          | Inositol monophosphatase inhibitor |
| 97.04                          | flumetasone                       | Glucocorticoid receptor agonist    |
| 96.97                          | hydrocortisone                    | Glucocorticoid receptor agonist    |
| 96.97                          | RHO-kinase-inhibitor-III[rockout] | Rho associated kinase inhibitor    |
| 96.9                           | desoximetasone                    | Glucocorticoid receptor agonist    |
| 96.79                          | triamcinolone                     | Glucocorticoid receptor agonist    |
| 96.62                          | tropisetron                       | Serotonin receptor antagonist      |
| 96.62                          | hydrocortisone                    | Glucocorticoid receptor agonist    |
| 96.58                          | hydrocortisone                    | Glucocorticoid receptor agonist    |
| 96.09                          | fluticasone                       | Glucocorticoid receptor agonist    |
| 95.77                          | budesonide                        | Glucocorticoid receptor agonist    |
| 95.55                          | halcinonide                       | Glucocorticoid receptor agonist    |
| 95.14                          | rimexolone                        | Glucocorticoid receptor agonist    |
| -96.81                         | PJ-34                             | PARP inhibitor                     |
